# Supplementary material for: Valproic acid-labeled chitosan nanoparticles promote recovery of neuronal injury after spinal cord injury
Source: publisher site journal article supplement (doi:10.18632/aging.103125), 2020-05-28
Supplement: Supplementary file [file aging-v12i10-103125-supplementary-material-SD1.pdf]

## SUPPLEMENTARY FIGURES

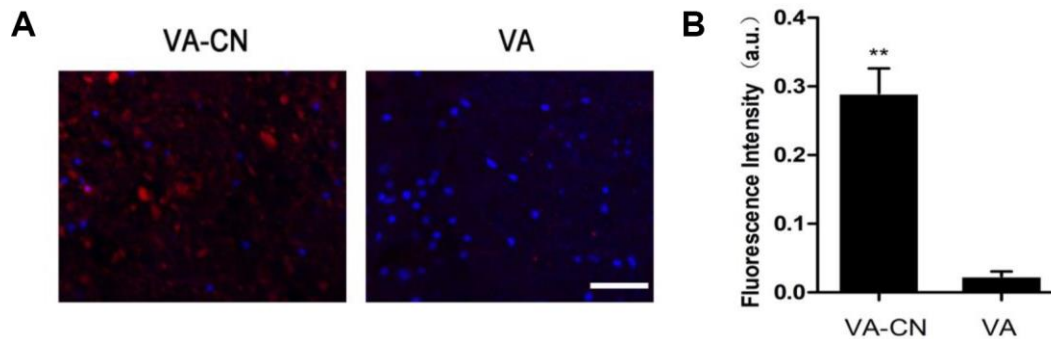

**Supplementary Figure 1. The distribution of VA-CN in the spinal cord of uninjured rats.** (A) Fluorescence images of VA-CN-Cy5.5 and VA-Cy5.5 in uninjured spinal cord at 48 h after treatment (Scale bar: 100  $\mu$ m), n=4 per group. (B) Quantitative results of fluorescence intensity of Cy5.5, n=4 per group. \*\* p<0.01.

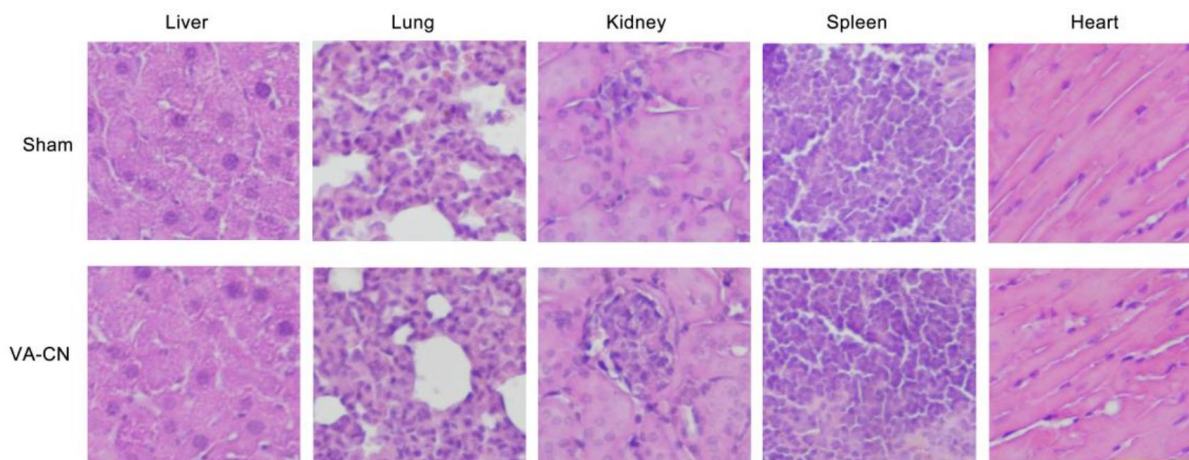

**Supplementary Figure 2. In vivo toxicity analysis.** Histological analysis of the liver, lung, spleen, kidney, and heart stained with hematoxylin and eosin in Sham and VA-CN treated rats at 4 weeks after injury (Scale bar: 50  $\mu$ m).
